# Supplementary material
Source: HighWire-hosted journal article supplement (http://thorax.bmjjournals.com/highwire/filestream/174050/field_highwire_adjunct_files/0/62185webonlyfig1.pdf)

Figure A: Mean weekly GP episode rate by age, England & Wales 1976-2004

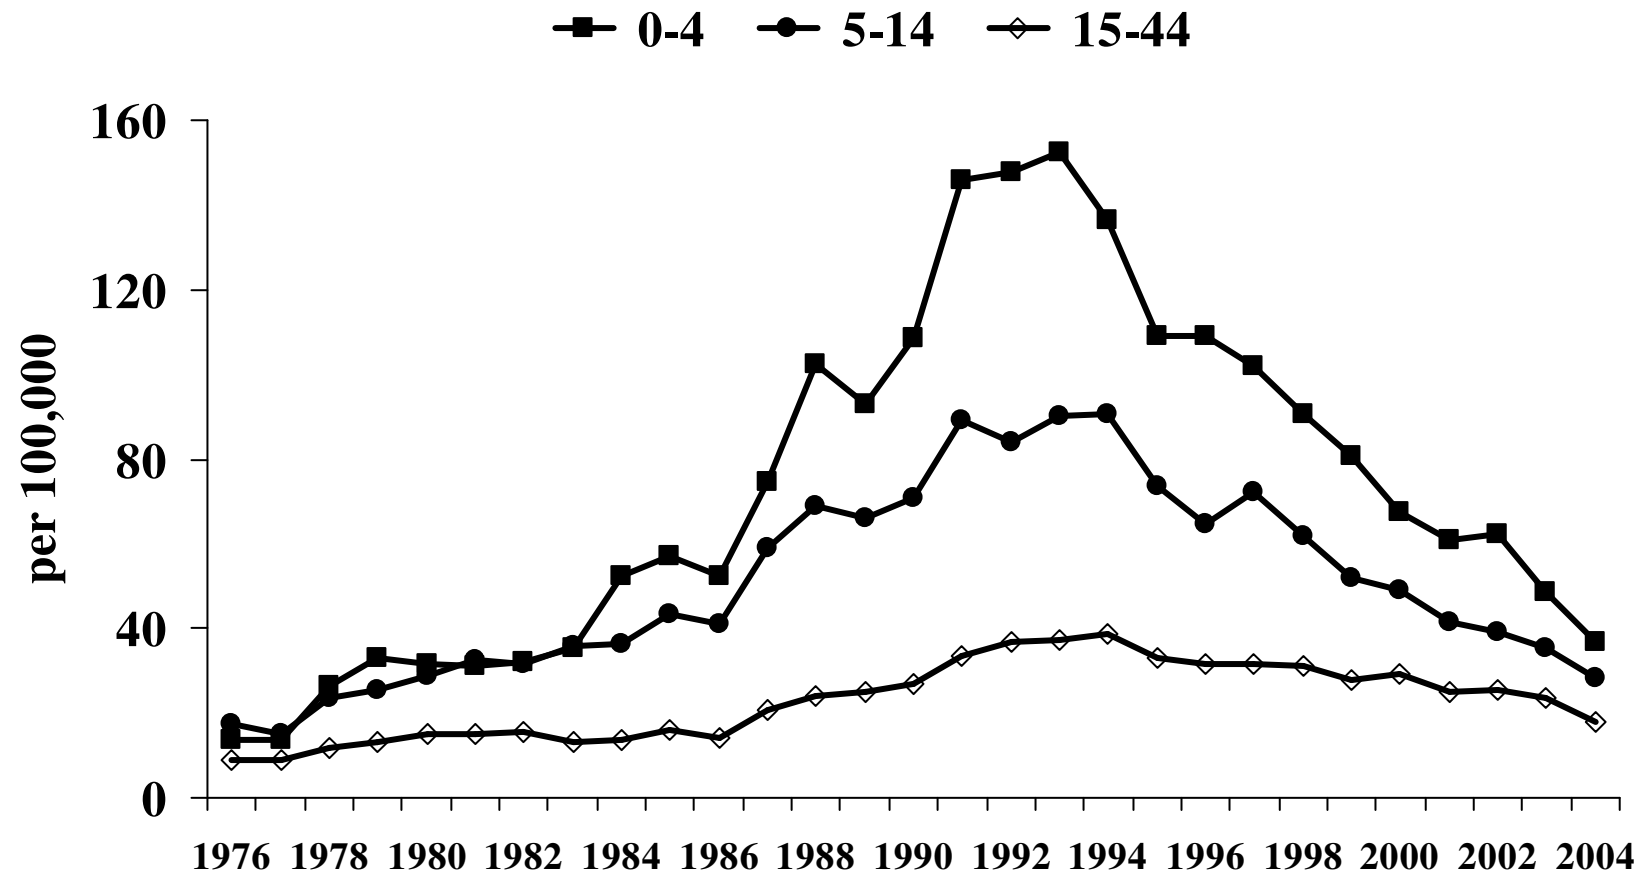

Supplement: 62185webonlyfig1.pdf [file 62185webonlyfig1.pdf]
